# Supplementary material
Source: publisher figshare collection journal article supplement (https://f1000.figshare.com/ndownloader/files/482381)
Supplement: Supplementary file 1 [file 482381]

**Explanation of column headers and codes:**

day - day of the experiment

div_trt - prey diversity treatment; “Monoculture” corresponds to treatments with only the CBS strain of *Synura* present; “Polyculture” corresponds to treatments with all five strains of *Synura* initially present.

brach_trt - predator treatment; “present” corresponds to the presence of the predator (*Brachionus*); “absent” corresponds to the absence of the predator

rep - numbered replicate identifier

logbrachdens - log10 transformed *Brachionus* density (individuals per mL)

synrelcolcelldens - relative abundance (proportion) of *Synura* cells found in colonies

lsyntotcelldens - log10 transformed total cell density of *Synura* (per mL)

lsyncoldens - log10 transformed density of *Synura* colonies (per mL)

lsyncolcelldens - log10 transformed density of *Synura* cells found in colonies (per mL)

brachresid - absolute values of the residuals from linear regressions of log10 transformed *Brachionus* density versus time

syntotcellresid - absolute values of the residuals from linear regressions of log10 transformed *Synura* total cell density versus time

synfreecellresid - absolute values of the residuals from linear regressions of log10 transformed *Synura* total free cell density versus time

syncolcellresid - absolute values of the residuals from linear regressions of log10 transformed density *Synura* cells found in colonies versus time
